# Supplementary material
Source: PubMed Central journal article supplement (PMC4787891)
Supplement: laml736892.ww1_default.pdf [file laml736892.ww1_default.pdf]

Appendix 1. Overview bottom-up calculation of costs of the integrated care program

| <b>Resources</b>          | <b>Description</b>                                                                                                                                     | <b>Aggregated costs (£)</b> |
|---------------------------|--------------------------------------------------------------------------------------------------------------------------------------------------------|-----------------------------|
| <b>Training</b>           |                                                                                                                                                        |                             |
| Trainer costs             | Training sessions: 5 trainers, time investment 2-42 hours, £ 48 - 89 hour;<br>Preparation training: 2 trainers, 6- 18 hours, £ 62 - 89/ hour.          | 8,003                       |
| Attendance cost           | Clinical occupational (n=2), occupational therapist (n=4), physical therapist (n=2)                                                                    | 5,077                       |
| Add. training costs       | Room rental/ equipment/ refreshments and study material                                                                                                | 2,515                       |
| Total training costs      | Sum trainer costs, attendance cost and additional costs.                                                                                               | 15,595                      |
| Training costs / patient  | Assumption: Every professional can treat 100 patients                                                                                                  | <b>63</b>                   |
| <b>Time investment</b>    |                                                                                                                                                        |                             |
| Health care professionals | Mean hours of investment: clinical occupational physician 2.2, £89/hour; physical therapist 18.1, £48/hour; occupational therapist was 7.6, £47/ hour. | <b>1,015</b>                |
| Total cost per patient    | Sum of training costs per patient and cost of time investment health care professionals.                                                               | <b>1,077</b>                |
